# Supplementary material for: Effectiveness of physical and occupational therapy on pain, function and quality of life in patients with trapeziometacarpal osteoarthritis – A systematic review and meta-analysis
Source: PubMed Central journal article supplement — Hand Ther. 2015 Nov 4;21(1):5–15. doi: 10.1177/1758998315614037 (PMC4778382; doi:10.1177/1758998315614037), 2015-11-04
Supplement: Supplementary_material_614037.pdf [file Supplementary_material_614037.pdf]

**Supplementary file: Study characteristics.**

|               | Method                                                     | Participants                                                                            | Intervention                                                                                                                                                                                                             | Outcomes                                                                                                             | Author's conclusions                                                                                                                                 | Time points and notes                                                     |
|---------------|------------------------------------------------------------|-----------------------------------------------------------------------------------------|--------------------------------------------------------------------------------------------------------------------------------------------------------------------------------------------------------------------------|----------------------------------------------------------------------------------------------------------------------|------------------------------------------------------------------------------------------------------------------------------------------------------|---------------------------------------------------------------------------|
| Bani 2013     | Randomised cross-over study                                | n=35 in 3 groups.<br>Mean age 53.4 / 54.9 / 58.6.<br>Female 67 / 75 / 73%.              | PFN splint vs. CMT splint vs. no splint. Each 4 weeks with 2 weeks wash-out.<br>Per day mean 8.4 / 8.2 h.                                                                                                                | Pain (VAS 0-10): average pain during previous week.<br>Function (DASH).                                              | Pain: improved with both splints.<br>Function: improved with both splints.                                                                           | 4 / 6 / 10 weeks.                                                         |
| Bani 2013a    | Repeated measures observational study                      | n=18<br>Mean age 56.<br>Female 83%.                                                     | CMT splint. Mean hours per day 8.6.                                                                                                                                                                                      | Pain (VAS 0-10): average pain during previous week.<br>Function (DASH).                                              | Pain: improvement.<br>Function: improvement.                                                                                                         | 30 / 60 / 90 days.<br>No controls.                                        |
| Bani 2014     | Repeated measures observational study                      | n=11<br>Mean age 55.4.<br>Female 82%.                                                   | PFN splint with CMT stabilization.<br>Mean h per day 7.9.                                                                                                                                                                | Pain (VAS 0-10).<br>Function (DASH).                                                                                 | Pain: improvement.<br>Function: improvement.                                                                                                         | 30 / 60 / 90 days.<br>No controls.                                        |
| Basford 1987  | RCT                                                        | Intervention n= 47, control n=34<br>Mean age 56.5/ 62.8.<br>No indication about gender. | Low energy laser, vs. placebo laser. 4 x 15 sec. 3x/week, for 3 weeks.                                                                                                                                                   | Pain-<br>Stiffness.<br>Activity.<br>On scale 0 - 4 or 5.                                                             | No improvement for any of the outcomes.                                                                                                              | At 1., 3., 6. and last session.                                           |
| Becker 2013   | Prospective parallel group trial                           | n=119. 62 completers.<br>Mean age 63 (SD=8.1).<br>Female 77%.                           | PFN splint vs. CMT splint.<br>To wear as needed.                                                                                                                                                                         | Disability (DASH).<br>Satisfaction (6 item 11-point scale).<br>Pain (VAS 0-10).                                      | Improvements with both splints for all outcomes. No difference between splints except comfort (prefabricated neoprene more comfortable).             | At second visit 5 – 15 weeks after provision of splint.                   |
| Berggren 2001 | Prospective randomised study.                              | n=33<br>Mean age 63 (range 46–60)<br>Female 100%.                                       | All: advice on how to accommodate ADL's. Group 1 plus technical accessories. Group 2 plus technical accessories plus semi-stable textile splint. Group 3 plus technical accessories plus non-stabilizing leather splint. | Need for surgery.                                                                                                    | Similar results for all groups.                                                                                                                      | 7 months and 7 years.<br>No controls.                                     |
| Boustedt 2009 | Comparative non-randomized controlled study                | n=35<br>Mean age 61 (range 50-76) resp. 61 (range 40-76). Female 100%.                  | Joint protection only vs. JP plus splints 24h/d plus hot packs plus daily exercises.<br>5 weeks program, 10 group sessions.                                                                                              | Pain: VAS 0-100mm at night and in motion during the most recent week.<br>Stiffness: VAS 0-100mm<br>Disability: DASH. | Pain at night: improvement in multimodal group.<br>Pain in motion: Improvement for both groups.<br>Other outcomes: improvement for multimodal group. | 1 week after end of the 5- week -program and after 1 year.                |
| Buurke 1999   | Prospective comparative study with randomized cross-design | n=10<br>Mean age 67.2 (range 37-90).<br>Female 100%.                                    | 3 different types of splints: thermoplastic semi-rigid, firm elastic, supple elastic.<br>Each worn 4 weeks.                                                                                                              | Pain: VAS 0-10cm<br>Function : VAS 0-10cm<br>Function: Green test.                                                   | Pain: similar improvement for all splints.<br>Function: best improvement for supple elastic splint.                                                  | No clear indications about time points, no baseline data.<br>No controls. |

|                   |                                                     |                                                                         |                                                                                                                              |                                                                                                                                                                    |                                                                                                                            |                                                                                      |
|-------------------|-----------------------------------------------------|-------------------------------------------------------------------------|------------------------------------------------------------------------------------------------------------------------------|--------------------------------------------------------------------------------------------------------------------------------------------------------------------|----------------------------------------------------------------------------------------------------------------------------|--------------------------------------------------------------------------------------|
| Carreira<br>2010  | RCT                                                 | n=40<br>Mean age 62.8 (SD =8.5), 65.1 (SD=10.1).<br>Female 50% and 45%. | SG: CMT splint for ADL for 180 days. CG: first 90 days CMT splint only for evaluation, then day 90 - 180 CMT splint for ADL. | Pain: VAS 0-10cm, average pain previous week.<br>Upper limb dexterity: O'Connor test<br>Function: DASH                                                             | Pain: improvement with splint.<br>Other outcomes: no improvement with splint.                                              | After 45 / 90 / 180 days.                                                            |
| Davenport<br>2012 | Pilot randomized controlled trial                   | n=48<br>Mean age 58 (SD=11) and 61 (SD=10).<br>Female 88% and 77%.      | Two different types of exercise: specific or general.                                                                        | DASH.<br>Pain: VAS 0-10 cm at rest and with pinch.                                                                                                                 | Similar improvement for both groups.                                                                                       | After 3 and 6 months.                                                                |
| Dickens<br>1989   | Single-blinded RCT                                  | n=13<br>Mean age 59 (SD=8.91) and 59.2 (SD=6.5).<br>Female 57% and 60%. | Acupuncture vs. mock TNS.<br>6 times over 2 weeks.                                                                           | Functional capacity: not explained.<br>Joint tenderness: not explained.<br>Sleep disturbances: not explained<br>Subjective improvement: not explained<br>Pain: VAS | Pain and disability: better with acupuncture.                                                                              | End of treatment and 2 weeks later.                                                  |
| Hermann<br>2014   | RCT                                                 | n=59<br>Mean age 70.2 (SD=6.2) and 70.7 (SD=7.3).<br>Female 98%.        | Exercises at home only vs. exercises at home plus soft elastic orthosis to wear in ADL.                                      | Pain: NAS 0-10, following strength measure.<br>Hand symptoms and activity: AUSCAN                                                                                  | Similar improvement for all outcomes.<br>In orthosis group better improvement of pain with orthosis than without orthosis. | 2 months.                                                                            |
| McKee<br>2006     | Observational study                                 | n=20<br>Mean age 59 (SD=7.1).<br>Female 89% and 82%.                    | CMT splint with TMC stabilization versus CMT splint with TMC plus MCP stabilization.                                         | Pain: 10 point scale.<br>Function: 10 point scale PRWHE.                                                                                                           | Pain: improvement with both splints.<br>Function: improvement with both splints.                                           | 4 weeks.<br>No controls.                                                             |
| Merrit<br>2012    | RCT                                                 | n=35 thumbs / 26 patients.<br>No indication about age.<br>Female 96%.   | Heat, exercises, 2 orthoses, joint protection instruction vs. sham cream treatment.<br>4 weeks.                              | Pain: VAS 0-10 cm, Pinch pain, stiffness and function: AUSCAN.                                                                                                     | Pain: improvement.<br>Function: improvement.                                                                               | 4 weeks.<br>Dissertation.                                                            |
| O'Brien<br>2013   | Retrospective chart review                          | n=35<br>Mean age 58 (range 30-82)<br>Female 89%.                        | Dynamic stability approach (=exercises plus splints plus joint protection).                                                  | Pain, function and symptoms: Quick DASH                                                                                                                            | Pain: improvement.<br>Function: improvement.                                                                               | Different time points, mean 44.5 days (17 - 195) after intervention.<br>No controls. |
| Randall<br>2000   | Randomized controlled double-blind cross-over study | n=27<br>Mean age 60 (range 45-82)<br>Female 85%.                        | Nettle sting vs. placebo nettle sting 14. Twice daily for 1 week. Then 5 weeks washout followed by 1 week twice daily.       | Pain: VAS 0-100mm.<br>Pain: verbal rating scale<br>Disability: Stanford Health questionnaire.                                                                      | Pain VAS: improvement.<br>Disability: improvement.                                                                         | After intervention and 5 weeks later.                                                |

|                 |                                |                                                                          |                                                                                                                                                                           |                                                                                              |                                                                                   |                                                                                                  |
|-----------------|--------------------------------|--------------------------------------------------------------------------|---------------------------------------------------------------------------------------------------------------------------------------------------------------------------|----------------------------------------------------------------------------------------------|-----------------------------------------------------------------------------------|--------------------------------------------------------------------------------------------------|
| Rannou 2009     | RCT                            | n=112<br>Mean age 63 (SD=7.9) and 63.5 (SD=7.6)<br>Female 93% and 87%.   | Custom- made neoprene splint for night plus usual care vs. usual care only (medicaments).                                                                                 | Pain: VAS 0-100mm during the previous 48h<br>Disability: Cochin hand function scale.         | Pain: improvement.<br>Disability: improvement.                                    | 1 and 12 months.<br>Unclear whether really neoprene or rather thermoplastic (see photos).        |
| Silleme 2011    | Observational cross-over study | n=56 in two groups (32 / 24).<br>Mean age 64 (SD=8.61).<br>Female 91%.   | PFN splint vs. CMT hybrid with Aquaplast.<br>4 weeks / 1 week washout / 4 weeks                                                                                           | Function: AUSCAN<br>Pain: AUSCAN pain sub scale                                              | Pain: better improvement with hybrid.<br>Similar improvements for other outcomes. | At 4 / 5 / 9 / 12 weeks.<br>No controls.                                                         |
| Swigart 1999    | Retrospective cohort study     | n=114 patients (130 thumbs).<br>No further informations given.           | Long opponens variety splint for 3-4 weeks continuously, then weaning for 3-4 weeks                                                                                       | Improvement of symptoms: questionnaire with yes/no and quartiles.                            | Improvement.                                                                      | Patient questionnaire 5 point –Likert scale<br>No p-values.<br>No controls.                      |
| Villafane 2011  | Observational study            | n=15<br>Mean age 81.9 (SD=6.51)<br>Female 87%.                           | Median nerve mobilization.<br>4 times in 2 weeks, 3 times at each session                                                                                                 | Pressure pain threshold: mechanical pressure algometer.                                      | Pain: improvement.                                                                | 5 min after intervention, 1 and 2 weeks.<br>Author speaks of "secondary TMC oa".<br>No controls. |
| Villafane 2011  | RCT                            | n=36<br>Mean age 81.5 (SD=2.4) and 80.2 (SD=1.9).<br>Female 100%.        | Kaltenborn mobilization vs. sham ultrasound.<br>6 sessions in 2 weeks.                                                                                                    | Pressure pain threshold: mechanical pressure gauge.                                          | Pain: improvement                                                                 | After treatment, after 1 and 2 weeks.<br>Author uses SE instead of SD.                           |
| Villafane 2012  | RCT                            | n=60<br>Mean age 80.9 (SD=2.9) and 81.7 (SD=2.9).<br>Female 93% and 87%. | Radial nerve mobilization vs. sham ultrasound (inactive).<br>6 times over 4 weeks.                                                                                        | Pressure pain threshold: mechanical pressure algometer.                                      | Pain: improvement.                                                                | Immediately after treatment, after 1 and 2 weeks.                                                |
| Villafane 2012a | RCT                            | n=28<br>Mean age 81.4 (SD=5.1) and 83.7 (SD=5.8).<br>Female 100%.        | Passive accessory mobilization (passive gliding TMC) vs. sham ultrasound (non-therapeutic).<br>4 times in 2 weeks.                                                        | Pressure pain threshold: mechanical pressure algometer.                                      | Pain: improvement<br>No improvement for the other outcomes.                       | Immediately after treatment, after 1 and 2 weeks.                                                |
| Villafane 2013  | RCT                            | n=60<br>Mean age 82.2 (SD=2) and 83.1 (SD=1).<br>Female 90% and 80%.     | Multimodal (joint mobilization, neurodynamic mobilization, exercises) vs. sham ultrasound (non-therapeutic, 0 W/cm <sup>2</sup> ).<br>12 times in 4 weeks, 3 times a week | Pain: VAS 0-10cm, with key pinch.<br>Pressure pain threshold: mechanical pressure algometer. | Pain: Improvement for intervention group.<br>No improvement for other outcomes.   | Immediately after treatment, after 1 and 2 months.                                               |

|            |                                  |                                                                           |                                                                                                                                                    |                                                                                                                  |                                                                                                                               |                                |
|------------|----------------------------------|---------------------------------------------------------------------------|----------------------------------------------------------------------------------------------------------------------------------------------------|------------------------------------------------------------------------------------------------------------------|-------------------------------------------------------------------------------------------------------------------------------|--------------------------------|
| Wajon 2005 | RCT                              | n=40<br>Mean age 59.7 (SD=9.0) and 61.2 (SD=12.5).<br>Female 74% and 81%. | 2 weeks thumb base strap, then 4 weeks strap plus abduction exercises vs. 2 weeks short opponens splint, then 4 weeks splint plus pinch exercises. | Pain: VAS 0-10cm, at rest.<br>Hand function: Sollerman test of hand function (0-80 points).                      | All outcomes: similar improvement for both groups                                                                             | 2 and 6 weeks.<br>No controls. |
| Weiss 2000 | Observational cross-design study | n=26<br>Mean age 57 (range 36-88).<br>Female 81%.                         | CMT short or long opponens splint.<br>Each for 1 week.<br>"Whenever they feel pain".                                                               | Pain: VAS 0-10cm, during and after functional use and at pinch grip.<br>ADL: 22 items 3-point self-rating scale. | Pain: similar improvement for both splints.<br>Function: improvement with short splint<br>No improvements for other outcomes. | Measured after each week.      |
| Weiss 2004 | Observational cross-design study | n=25<br>Mean age not given.<br>Female 84%.                                | Long PFN splint vs. CMT short opponens splint.<br>Each 1 week.<br>To wear as needed                                                                | Pain: during and after use, when pinching, VAS 0-10cm.<br>Function: ADL self-rating scale.                       | Pain: better improvement for PNF.<br>Function: better improvement with PFN.                                                   | Measured after each week.      |

#### Abbreviations :

- ADL: activities of daily life
- CMT: custom-made thermoplast splint
- JP: joint protection
- MCP: metacarpophalangeal joint
- PA: posterior-anterior
- PFN: prefabricated neoprene splint
- RCT: randomized controlled d trial
- TMC: trapeziometacarpal joint
- TNS: transcutaneous neurostimulation
